# Supplementary material for: Speciation of Selenium in Selenium-Enriched Foods by High-Performance Liquid Chromatography-Inductively Coupled Plasma-Tandem Mass Spectrometry
Source: MDPI journal article supplement (doi:10.3390/separations9090242), 2022-09-03
Supplement: s1 [file s1]

# Electronic Supplementary Information

## Speciation of Selenium in Selenium-enriched Foods by High-performance Liquid Chromatography–Inductively Coupled Plasma–Tandem Mass Spectrometry

Yue Luo<sup>a</sup>, Gang Chen<sup>a</sup>, Xiuqing Deng<sup>a</sup>, Hanqing Cai<sup>a</sup>, Xueheng Fu<sup>a</sup>, Fujian Xu<sup>b\*</sup>,  
Xiaonian Xiao<sup>c</sup>, Yumeng Huo<sup>d</sup>, Jin Luo<sup>a\*</sup>

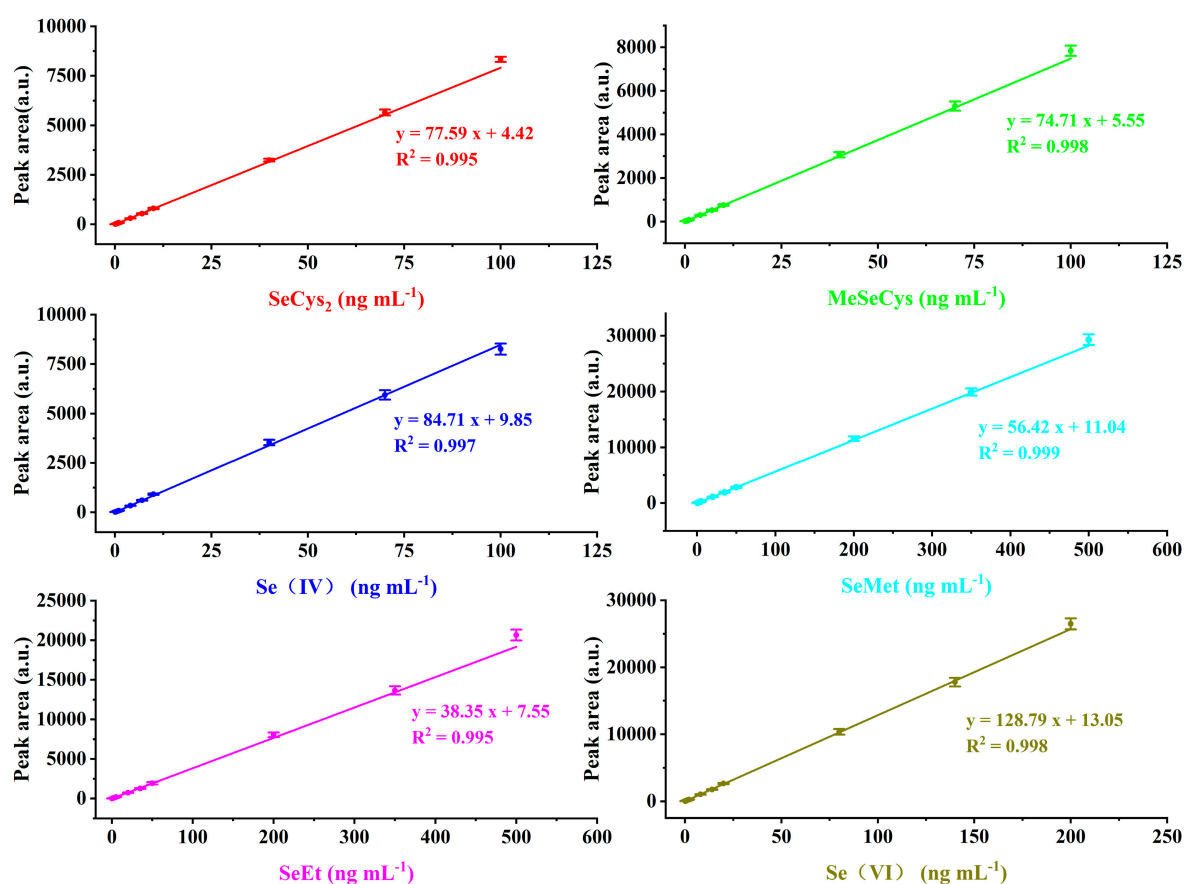

Figure S1 Fitted standard curve of six selenium species.

Table S1. Recovery test results of standard addition to selenium-enriched drinking water (n=3)

| Component          | Detect<br>(ng mL <sup>-1</sup> ) | Added<br>(ng mL <sup>-1</sup> ) | Measured<br>(ng mL <sup>-1</sup> ) | Recovery<br>(%) | RSD<br>(%) |
|--------------------|----------------------------------|---------------------------------|------------------------------------|-----------------|------------|
|                    |                                  | 4.00                            | 4.13                               | 103             | 3.02       |
| SeCys <sub>2</sub> | -                                | 10.0                            | 9.82                               | 98.2            | 2.67       |
|                    |                                  | 40.0                            | 38.5                               | 96.3            | 2.15       |
|                    |                                  | 4.00                            | 4.07                               | 102             | 2.94       |
| MeSeCys            | -                                | 10.0                            | 10.3                               | 103             | 2.51       |
|                    |                                  | 40.0                            | 38.2                               | 95.5            | 2.31       |
|                    |                                  | 4.00                            | 3.92                               | 98.0            | 2.62       |
| Se(IV)             | -                                | 10.0                            | 10.2                               | 102             | 2.49       |
|                    |                                  | 40.0                            | 39.3                               | 98.3            | 2.16       |
|                    |                                  | 20.0                            | 19.4                               | 97.0            | 3.13       |
| SeMet              | -                                | 50.0                            | 48.2                               | 96.4            | 2.80       |
|                    |                                  | 200                             | 204                                | 102             | 2.52       |
|                    |                                  | 20.0                            | 19.3                               | 96.5            | 2.94       |
| SeEt               | -                                | 50.0                            | 47.7                               | 95.4            | 2.75       |
|                    |                                  | 200                             | 196                                | 98.2            | 2.17       |
|                    |                                  | 8.00                            | 20.8                               | 101             | 2.52       |
| Se(VI)             | 12.8                             | 20.0                            | 32.6                               | 99.3            | 2.34       |
|                    |                                  | 80.0                            | 92.3                               | 99.4            | 2.33       |

"-" indicates that the target was not detected.

Table S2. Test results of standard addition and recovery of selenium-enriched salts (n=3)

| Component          | Detect<br>(µg kg <sup>-1</sup> ) | Added<br>(µg kg <sup>-1</sup> ) | Measured<br>(µg kg <sup>-1</sup> ) | Recovery<br>(%) | RSD<br>(%) |
|--------------------|----------------------------------|---------------------------------|------------------------------------|-----------------|------------|
|                    |                                  | 4.00                            | 7.59                               | 95.4            | 3.01       |
| SeCys <sub>2</sub> | 3.77                             | 10.0                            | 13.4                               | 96.2            | 2.95       |
|                    |                                  | 40.0                            | 42.8                               | 97.5            | 2.87       |
| MeSeCys            | -                                | 4.00                            | 3.85                               | 96.2            | 2.95       |

|        |      |      |      |      |      |
|--------|------|------|------|------|------|
|        |      | 10.0 | 9.86 | 98.6 | 2.84 |
|        |      | 40.0 | 40.6 | 102  | 2.87 |
|        |      | 4.00 | 6.95 | 102  | 2.38 |
| Se(IV) | 2.87 | 10.0 | 12.7 | 98.4 | 2.26 |
|        |      | 40.0 | 43.3 | 101  | 2.18 |
|        |      | 20.0 | 19.6 | 98.2 | 3.13 |
| SeMet  | -    | 50.0 | 48.1 | 96.1 | 2.52 |
|        |      | 200  | 207  | 103  | 2.75 |
|        |      | 20.0 | 19.5 | 97.4 | 3.25 |
| SeEt   | -    | 50.0 | 49.1 | 98.2 | 3.40 |
|        |      | 200  | 207  | 103  | 3.52 |
|        |      | 8.00 | 7.88 | 98.5 | 2.64 |
| Se(VI) | -    | 20.0 | 20.7 | 104  | 2.52 |
|        |      | 80.0 | 84.1 | 105  | 2.17 |

"-" indicates that the target was not detected.

Table S3. Test results of standard addition recovery of selenium-enriched tea extract (n=3)

| Component          | Detect<br>( $\mu\text{g kg}^{-1}$ ) | Added<br>( $\mu\text{g kg}^{-1}$ ) | Measured<br>( $\mu\text{g kg}^{-1}$ ) | Recovery<br>(%) | RSD<br>(%) |
|--------------------|-------------------------------------|------------------------------------|---------------------------------------|-----------------|------------|
|                    |                                     | 4.00                               | 5.76                                  | 93.7            | 2.34       |
| SeCys <sub>2</sub> | 2.01                                | 10.0                               | 11.8                                  | 97.4            | 2.26       |
|                    |                                     | 40.0                               | 40.5                                  | 96.1            | 3.14       |
|                    |                                     | 4.00                               | 7.39                                  | 94.3            | 2.23       |
| MeSeCys            | 3.62                                | 10.0                               | 13.3                                  | 96.5            | 2.15       |
|                    |                                     | 40.0                               | 42.1                                  | 96.3            | 3.15       |
|                    |                                     | 4.00                               | 6.11                                  | 102             | 2.26       |
| Se(IV)             | 2.03                                | 10.0                               | 11.9                                  | 98.4            | 2.35       |
|                    |                                     | 40.0                               | 41.2                                  | 97.8            | 2.20       |
|                    |                                     | 20.0                               | 26.8                                  | 104             | 3.27       |
| SeMet              | 5.98                                | 50.0                               | 53.7                                  | 95.2            | 2.96       |

|        |      |      |      |      |      |
|--------|------|------|------|------|------|
|        |      | 200  | 200  | 96.9 | 2.09 |
|        |      | 20.0 | 18.6 | 93.2 | 3.14 |
| SeEt   | -    | 50.0 | 47.1 | 94.1 | 2.69 |
|        |      | 200  | 202  | 101  | 2.79 |
|        |      | 8.00 | 14.7 | 101  | 3.37 |
| Se(VI) | 6.57 | 20.0 | 27.4 | 104  | 2.67 |
|        |      | 80.0 | 84.9 | 97.9 | 2.92 |

"-" indicates that the target was not detected.

Table S4. Analysis results of selenium speciation in selenium-enriched drinking water (ng mL<sup>-1</sup>)

| Sample                                  | SeCys <sub>2</sub> | MeSeCys | Se(IV) | SeMet | SeEt | Se(VI) |
|-----------------------------------------|--------------------|---------|--------|-------|------|--------|
| Hanshui<br>Selenium<br>Valley           | -                  | -       | -      | -     | -    | 16.0   |
| Watertime                               | -                  | -       | -      | -     | -    | 0.26   |
| Bama Platinum<br>Springs                | -                  | -       | -      | -     | -    | 0.47   |
| DaQin TaiJi<br>Springs                  | -                  | -       | -      | -     | -    | 1.00   |
| LongWang<br>Selenium<br>Spring          | -                  | -       | -      | -     | -    | 12.87  |
| RunTiancui                              | -                  | -       | -      | -     | -    | 4.97   |
| Global Village<br>Life Spring           | -                  | -       | -      | -     | -    | 0.46   |
| XiBeijian                               | -                  | -       | -      | -     | -    | 0.20   |
| Longquan, the<br>capital of<br>selenium | -                  | -       | -      | -     | -    | 12.0   |
| Xianfu<br>Mountain<br>Spring            | -                  | -       | -      | -     | -    | 1.04   |
| Xingdou<br>Mountain<br>Spring           | -                  | -       | -      | -     | -    | 0.39   |

|                           |   |   |   |    |   |      |
|---------------------------|---|---|---|----|---|------|
| Bama Mountain Spring      | - | - | - | -  | - | 0.33 |
| Poly selenium rich spring | - | - | - | -- | - | 3.61 |

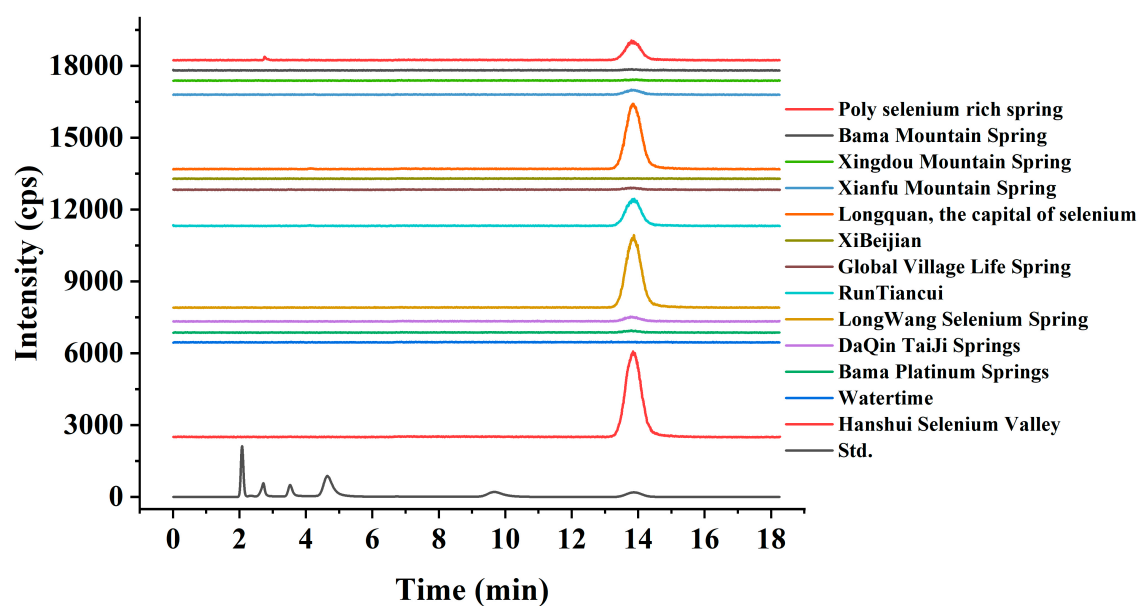

**Figure S2.** Chromatograms of 13 kinds of selenium-enriched drinking water. (Hamilton PRP-X100 column; 25  $\mu$ L injected; Mobile phase conditions: 2% methanol, 25 mM Sodium citrate, pH=4.0, flow rate of 1.0 ml min<sup>-1</sup>).

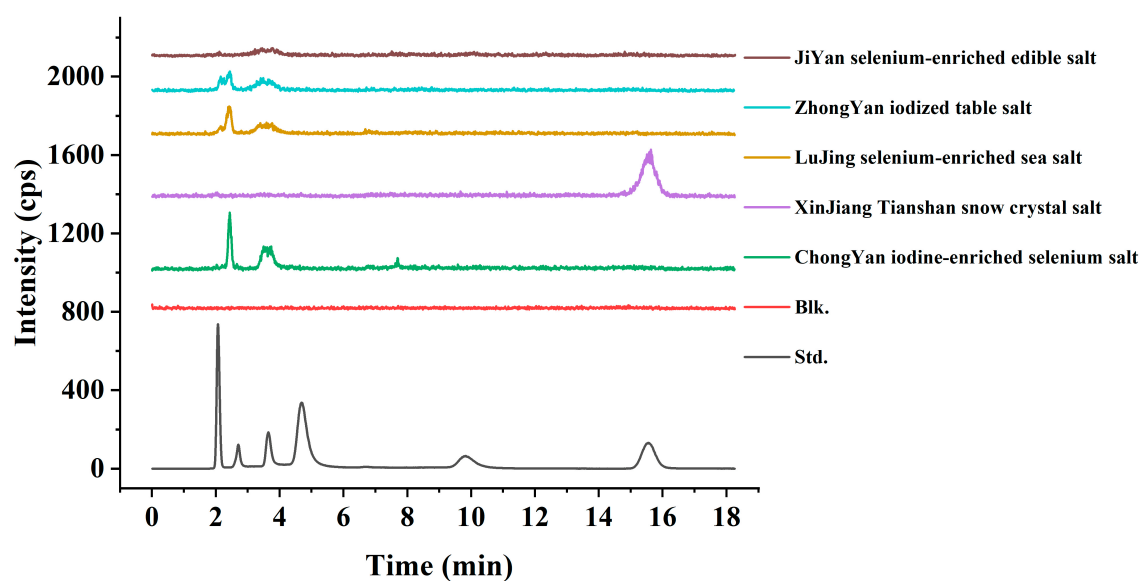

**Figure S3.** Chromatograms of five selenium-enriched salts. (Hamilton PRP-X100 column; 25  $\mu\text{L}$  injected; Mobile phase conditions: 2% methanol, 25 mM Sodium citrate, pH=4.0, flow rate of 1.0  $\text{ml min}^{-1}$ ).

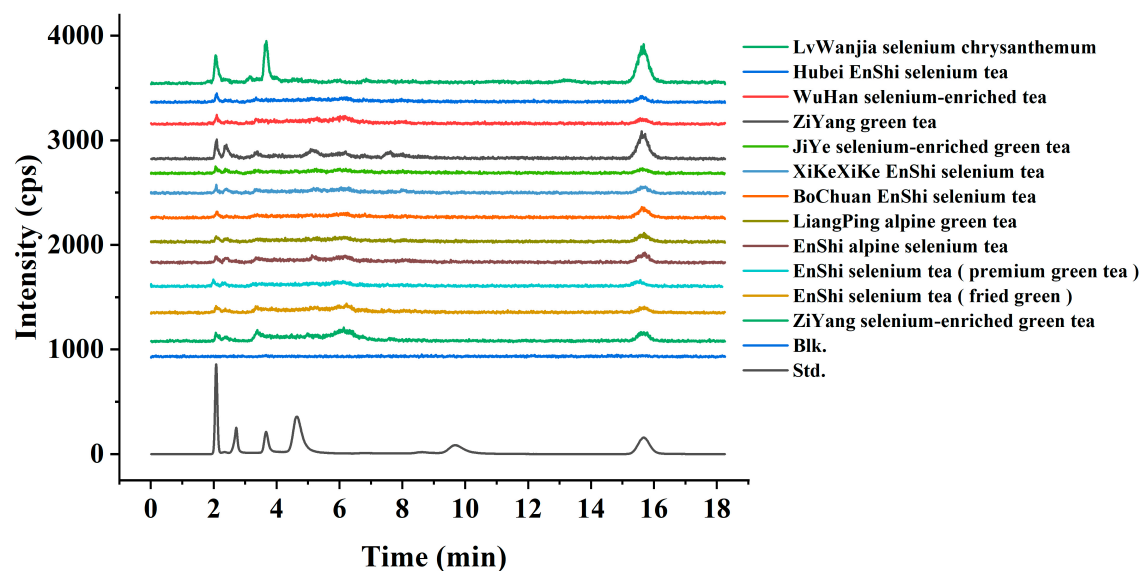

**Figure S4.** Chromatograms of 12 kinds of selenium-enriched tea leaves. (Hamilton PRP-X100 column; 25  $\mu\text{L}$  injected; Mobile phase conditions: 2% methanol, 25 mM Sodium citrate, pH=4.0, flow rate of 1.0  $\text{ml min}^{-1}$ ).
